1 Corresponding Author:  
 2 Dr. Megan L. Fritz  
 3 112 Derieux Place  
 4 1549 Thomas Hall  
 5 Department of Entomology  
 6 North Carolina State University  
 7 Raleigh, NC 27695  
 8 [mlfritz@ncsu.edu](mailto:mlfritz@ncsu.edu)  
 9 (919) 515-1651  
 10

11 **Application of a dense genetic map for assessment of genomic responses to selection and**  
 12 **inbreeding in *Heliothis virescens*.**

13

14 Megan L. Fritz<sup>1,2,§</sup>, Sandra Paa<sup>1</sup>, Jennifer Baltzegar<sup>2</sup>, and Fred Gould<sup>1,2</sup>

15 <sup>1</sup>Department of Entomology, North Carolina State University, Raleigh, NC, USA

16 <sup>2</sup>Department of Biological Sciences, Program in Genetics, North Carolina State University, Raleigh,  
 17 NC, USA

18 <sup>§</sup>Corresponding Author

## 19 Abstract

20           Adaptation of pest species to laboratory conditions and selection for resistance to toxins in the  
 21 laboratory are expected to cause inbreeding and genetic bottlenecks that reduce genetic variation.  
 22 *Heliothis virescens*, a major cotton pest, has been colonized in the laboratory many times, and a few  
 23 laboratory colonies have been selected for Bt resistance. We developed 350 bp Double-Digest  
 24 Restriction-site Associated DNA-sequencing (ddRAD-seq) molecular markers to examine and compare  
 25 changes in genetic variation associated with laboratory adaptation, artificial selection, and inbreeding in  
 26 this non-model insect species. We found that allelic and nucleotide diversity declined dramatically in  
 27 laboratory-reared *H. virescens* as compared with field-collected populations. The declines were  
 28 primarily due to the loss of low frequency alleles present in field-collected *H. virescens*. A further,  
 29 albeit modest decline in genetic diversity was observed in a Bt-selected population. The greatest  
 30 decline was seen in *H. virescens* that were sib-mated for 10 generations, where more than 80% of loci  
 31 were fixed for a single allele. To determine which regions of the genome were resistant to fixation in  
 32 our sib-mated and Bt-selected lines, we generated a dense intraspecific linkage map containing 3 PCR-  
 33 based, and 659 ddRAD-seq markers. Markers that retained polymorphism were observed in small  
 34 clusters spread over multiple linkage groups. These markers are likely associated with genomic  
 35 regions under balancing selection, thus preventing fixation of deleterious alleles.

36 **Keywords:** *Heliothis virescens*, genetic variation, colonization, inbreeding, ddRAD-seq, linkage map

## 37 **Introduction**

38       Laboratory-reared insect colonies are important resources for many types of entomological  
39 experiments. They are used to quantify physiological or behavioral differences between insect  
40 populations or species (Dekker *et al.*, 2006; Dobzhansky & Spassky, 1954; Fritz *et al.*, 2015; Groot *et*  
41 *al.*, 2005; Shaw *et al.*, 2000; Sokolowski, 1980; Tomaru *et al.*, 2000), identify the genetic architecture  
42 of insect traits (Gahan *et al.*, 2010, Mackay *et al.*, 2012, Oppenheim *et al.*, 2012), develop insect  
43 populations that express desirable traits (Collins, 1984; Goldman *et al.*, 1986; Gould *et al.*, 1995; Hoy,  
44 1989; Pradeep *et al.*, 2005), and generate genetically modified species as a means of pest control (de  
45 Valdez *et al.*, 2011). A major concern for researchers maintaining insect colonies is the degree to which  
46 adaptation to the laboratory environment affects insect genotypic, and thereby phenotypic diversity  
47 (Boller, 1972; Huettel, 1976).

48       The phenotypic consequences of adaptation to the laboratory depend upon the trait of interest,  
49 and range from undetectable to severe (Baeshen *et al.*, 2014; Fox *et al.*, 2007; Gerloff *et al.*, 2003;  
50 Raulston, 1975; Roush, 1986). Observed phenotypic changes can be attributed to inadvertent selection  
51 for traits that are favorable in the laboratory environment (Roush, 1986), inbreeding depression (*i.e.*  
52 reduction in fitness caused by matings between related individuals; reviewed in Charlesworth & Willis,  
53 2009; Mackauer, 1976), or the interaction of the two. Indeed, the selection that occurs during colony  
54 establishment creates conditions conducive to inbreeding (Roush, 1986). Families with higher fitness  
55 under laboratory conditions contribute disproportionately to the reproductive pool, thereby increasing  
56 the probability of matings between related individuals. Where selection is very strong, as in the  
57 production of an insecticide resistant colony, measures must often be taken to minimize the effects of  
58 inbreeding and thereby inbreeding depression (Gould *et al.*, 1995). Overall, the expectation is that the  
59 selection and inbreeding that takes place during insect colonization results in an overall loss of genetic

60 diversity (Munstermann, 1994), and concomitant genome-wide increase in homozygosity (reviewed in  
61 Etzel & Legner, 1999).

62 Previous studies that have examined genetic differences between field-collected, laboratory-  
63 adapted, and inbred populations of non-model insects have primarily focused on Dipteran species and  
64 were limited to small numbers of molecular markers (Mukhopadhyay *et al.*, 1997; Munstermann, 1994;  
65 Norris *et al.*, 2001). Such small numbers of markers allow for estimation of the genome-wide average  
66 change in genetic variability across populations, but cannot be used to examine fine-scale patterns of  
67 genomic change. Examination of these patterns allows for identification of where and how genetic  
68 variation, the raw material necessary for environmental adaptation, is maintained (Dobzhansky &  
69 Spassky, 1954). The relatively recent development of high-throughput sequencing combined with  
70 reduced-representation DNA library preparation techniques allows for the discovery of hundreds to  
71 thousands of new molecular markers, even in species for which genomic data are absent (Davey *et al.*,  
72 2011). Here we used Double-Digest Restriction-Site Associated DNA Sequencing (ddRAD-seq;  
73 Peterson *et al.*, 2012), one type of reduced representation library, for *de novo* construction of molecular  
74 markers in the non-model species, *Heliothis virescens*.

75 The tobacco budworm, *H. virescens*, is an historically important pest of cotton throughout much  
76 of the Southeastern United States (Blanco, 2012). This non-model Lepidopteran species has been  
77 colonized a number of times for investigations of mating and host-selection behaviors (Sheck & Gould,  
78 1995; Sheck & Gould, 1996; Sheck *et al.*, 2006), as well as detecting the underlying genetic basis for  
79 insecticide resistance (Gahan *et al.*, 2001; Gahan *et al.*, 2010; Taylor *et al.*, 1993). We used our newly  
80 developed ddRAD-seq markers to examine and compare the effects of colonization, selection, and sib-  
81 mating on *H. virescens* genome-wide measures of genetic diversity. To examine fine-scale patterns of  
82 change in genetic diversity, we also used our ddRAD-seq markers to generate a dense intraspecific

genetic map for *H. virescens*. This map consists of 659 high quality 350-bp markers which will serve as an important genomic resource to the entomological community.

Overall, our research aims to:

1. Quantify overall patterns of change in genomic diversity across field-collected, laboratory-reared (non-selected), Bt-selected, and sib-mated *H. virescens*.
2. Determine whether the observed degree of inbreeding in our sib-mated *H. virescens* calculated from our ddRAD-seq genotypic data matched theoretical expectations (Falconer & Mackay 1996).
3. Examine fine-scale patterns of genomic change by identifying which genomic regions were resistant to fixation in Bt-selected and sib-mated lines using ddRAD-enabled linkage mapping.

## Results

We sequenced 204 *H. virescens* individuals from a total of 6 populations that were used in a population-level analysis of genomic change associated with laboratory colonization, artificial selection and inbreeding. These populations were comprised of 2 field-collected, 2 laboratory-reared, and 1 Bt-selected population, as well as specimens from a single inbred family following 10 generations of full-sibling mating (Table 1). Three of these populations, YDK, YHD2, and the inbred line were founded from a collection in Yadkin County, NC, in 1988 (Gould *et al.*, 1995), but were thereafter subjected to different rearing conditions, allowing us to make comparisons of population-genomic change within the same genetic background. In addition, 99 individuals (2 parents and 97 progeny) were sequenced for linkage analysis. This produced a total of 105,487,499 Illumina MiSeq reads (38,221,995 and 67,265,504 for linkage- and population-level analyses, respectively) that passed quality filters (data available upon request).

## 106 Genomic diversity among *H. virescens* populations

107       On average, 338,892 sequencing reads (*s.d.* = 113397) were produced per individual, and the  
 108 variation in average read counts was spread uniformly across populations (Supplementary Figure 1).  
 109 Ninety-four percent of individuals had read counts between 90,000 and 688,000, and were fed into the  
 110 Stacks pipeline (Catchen *et al.*, 2011; 2013) for *de novo* locus construction (Supplementary Figure 1).  
 111 Loci constructed by Stacks were sequenced to a 6× average depth of coverage per individual. In total,  
 112 4,281 polymorphic 350-bp ddRAD-seq markers (hereafter loci) were detected in at least one individual  
 113 per population across all populations. Two well-documented challenges commonly encountered when  
 114 working with moderate coverage reduced representation library data like ours are: 1) uneven  
 115 distribution of missing data across sets of loci (Davey *et al.*, 2012; Xu *et al.*, 2014), and 2) under-  
 116 sampling of heterozygotes (Li *et al.*, 2009; Nielsen *et al.*, 2011). Both reduce confidence in final  
 117 genotypes called by genotyping-by-sequencing SNP calling algorithms, including the algorithm used in  
 118 Stacks. To overcome these challenges, we examined several subsets of these 4,281 polymorphic loci  
 119 for our downstream population genomic analyses. These subsets contained between 125-1231 loci, and  
 120 were chosen based upon the overall proportion missing genotype calls in the subset. The smallest  
 121 subset consisted of loci for which over 75% of individuals per population had genotypic data present  
 122 and were therefore likely sequenced to greatest depth of coverage. Each larger subset allowed  
 123 additional loci at the expense of coverage (*i.e.* more missing genotypic data were allowed; Table 2). By  
 124 using multiple datasets, we were able to examine whether the presence of missing genotype calls  
 125 influenced overall estimates of genomic diversity across populations.

126       We first examined all subsets of loci and determined the mean and maximum numbers of alleles  
 127 per locus (Table 2). Across all sequenced populations (*n* = 192 total *H. virescens*), the mean numbers  
 128 of unique alleles detected per locus ranged from 29 to 34 depending upon the number of loci included

129 in the analysis. As more loci were included, the average number of unique alleles detected per locus  
 130 decreased. However, the maximum number of unique alleles detected increased from 86 in the  
 131 smallest subset of loci to 94 in the 3 larger subsets. We also examined the proportion of loci that were  
 132 fixed (*i.e.* only a single allele present) across populations. Across subsets, few loci were fixed for a  
 133 single allele in laboratory-reared (5.6-10.9%), Bt-selected (5.3-7.3%) and field-collected (0-2.4%)  
 134 populations (Table 2). Yet over 80% of loci were fixed in the inbred line following 10 generations of  
 135 sib-mating (Table 2). Of the 125 loci with the fewest missing genotype calls, 86% were fixed in the  
 136 inbred line. Expanding the number of loci to include those with more missing genotypes ( $n = 378, 573,$   
 137  $1231$ ) reduced the percentage of fixed loci in the inbred line by up to 5% (Table 2).

138 We then determined the mean number of unique alleles present per locus for each subset of loci  
 139 (Supplementary Figure 2). In general, we found no within population differences in the mean numbers  
 140 of unique alleles detected among subsets of loci, and therefore we used a single, conservatively chosen  
 141 subset of loci ( $n = 378$ ) where at least 10 individuals were genotyped per population per locus for  
 142 further analysis. The mean numbers of unique alleles per locus were 2.1 for the inbred line, 5.3 for the  
 143 Bt-selected population, 5.4 and 4.4 for the non-selected, laboratory-reared populations (YDK and  
 144 BENZ, respectively), and 18.4 and 17 for the field-collected populations (LA and TX, respectively).  
 145 However, our sample sizes (*i.e.* numbers of individuals sequenced; see Table 1) differed for each  
 146 population, and it was unclear whether differences between the aforementioned means were caused by  
 147 sample size or population-level differences. To determine whether the mean number of unique alleles  
 148 per locus differed according to population, where sample sizes were equal across populations, we  
 149 randomly sampled 6, 12, 18, and 24 alleles per population per locus without replacement. We found  
 150 that increasing the total number of alleles sampled led to an increase in the mean numbers of unique  
 151 alleles per locus for all but the inbred line (Figure 1). Regardless of the number of alleles sampled,

152 field populations always exhibited the greatest allelic diversity, followed by selected and non-selected  
153 colony populations. The lowest allelic diversity was observed in the inbred line.

154 When 18 alleles were randomly sampled per population per locus, we detected an average of  
155 just over 1 unique allele per locus in the inbred line, indicating that most loci were fixed for a single  
156 allele. For the inbred line, 52 loci did not reach fixation. Of these, forty-seven had 2 unique alleles,  
157 four had 3 unique alleles, and one had 4 unique alleles out of the 18 that were randomly sampled. On  
158 average, Bt-selected and non-selected colony strains each had *ca.* 3 unique alleles per locus, and field-  
159 collected populations had *ca.* 9 unique alleles per locus (Figure 1). The majority of unique alleles  
160 present in the field-collected populations (70.3% and 68.7% for LA and TX populations, respectively)  
161 were observed only once (of 18 alleles; Figure 2). Low frequency alleles were less common in the Bt-  
162 selected and non-selected laboratory populations (35.1% and 21.5%, respectively) and rare (0.7%) in  
163 the sib-mated inbred line (Figure 2).

164 To further quantify and compare genetic diversity by population, we used the same random  
165 sampling regime ( $n = 18$  alleles without replacement), paired with the same conservative subset of loci  
166 ( $n = 378$ ) to calculate sample-size corrected  $S_K$  (Charlesworth & Charlesworth, 2010), and  $\pi$  (Nei 1978;  
167 Nei & Li, 1979). These two measures are complementary:  $\pi$  is calculated as the proportion of  
168 nucleotides that differ per two randomly chosen DNA sequences, averaged across all pairwise  
169 comparisons per marker per population, and  $S_K$  is calculated as the number of unique single nucleotide  
170 variants in a population at a single locus. When averaged across all markers ( $n = 378$ ), the number of  
171 variant sites ( $S_K$ ) per 350 bp marker was 0.15 for the inbred line, and the maximum  $S_K$  was 2.95. Bt-  
172 selected and non-selected laboratory populations had, on average, just over 1 nucleotide variant per 350  
173 bp locus, with a maximum of *ca.* 6. Field-collected populations had the greatest number of variant sites  
174 per 350 bp locus, where the genome-wide average was just over 5 nucleotide variants per locus, with a



175 maximum of *ca.* 15. Similar trends were observed for genome-wide and maximum nucleotide diversity  
 176 ( $\pi$ ) values. Relative to the laboratory-reared populations, genome-wide estimates of  $\pi$  were nearly an  
 177 order of magnitude lower for the inbred line. The genome-wide  $\pi$  estimate for laboratory-reared  
 178 populations ranged from  $4.0 \times 10^{-3}$  (Bt-selected population) to  $6.7 \times 10^{-3}$  (non-selected, YDK population),  
 179 and  $6.2 \times 10^{-4}$  for the inbred line. Field-collected populations exhibited genome-wide  $\pi$  estimates of  
 180  $9.3 \times 10^{-3}$  and  $9.2 \times 10^{-3}$  for the LA and TX populations, respectively. All genome-wide and maximum  $\pi$   
 181 and  $S_K$  estimates, along with their corresponding 95% non-parametric bootstrapped confidence intervals  
 182 ( $N = 5000$ ) are reported in Table 3.

183

#### 184 *Inbreeding among laboratory-reared H. virescens populations*

185 To determine whether the observed degree of homozygosity in our inbred line was consistent  
 186 with that which would be expected following 10 generations of sib-mating, we compared the  
 187 inbreeding coefficient  $F$ , as calculated according to pedigree- (Falconer & Mackay, 1996) and DNA  
 188 marker-based information (Keller & Waller, 2002; Kim *et al.*, 2007). The expected inbreeding  
 189 coefficient ( $F_I$ ), following 10 generations of sib-mating was 0.89. This expected value fell within the  
 190 bootstrapped 95% confidence intervals for marker-based inbreeding coefficients ( $F_{IT}$ ) calculated from  
 191 all subsets of markers. This indicated that there was no significant difference between the expected  
 192 inbreeding coefficient and the observed inbreeding coefficient calculated using ddRAD-seq marker  
 193 data. The genome-wide  $F_{IT}$  values (95% CIs) were 0.92 (0.88, 0.96), 0.89 (0.86, 0.92), 0.89 (0.87,  
 194 0.92), and 0.88 (0.86, 0.89), for the inbred line as calculated from 125, 378, 573, and 1231 ddRAD-seq  
 195 loci, respectively.

196

197

## 198 Linkage mapping

199 Few genomic resources are available for *H. virescens*. Therefore, we determined the genomic  
 200 location of loci which were resistant to fixation by generating a dense ddRAD-seq linkage map. The  
 201 map was produced using a male informative cross (reviewed in Baxter *et al.*, 2009), and was comprised  
 202 of 659 informative polymorphic loci generated by ddRAD-seq, plus 3 partial gene sequences of  
 203 *ABCC2*, *HevCaLP*, and *Desat1*. Adding these partial gene sequences to our linkage map, all with  
 204 known locations in the *B. mori* genome allowed us to validate marker groupings for our linkage map.  
 205 All informative ddRAD-seq loci were grouped into 33 linkage groups, two more than the expected 30  
 206 *H. virescens* autosomes, and one segregating Z chromosome from the hybrid male parent used in our  
 207 cross. Linkage groups ranged in size from 7cM to 110cM (Figure 3), and yielded a total map length of  
 208 1919.5 cM. On average, there were 20 ddRAD-seq loci per linkage group, and the average spacing  
 209 was one locus per 3.5 cM. The smallest and largest linkage groups contained 3 and 53 loci,  
 210 respectively. The *HevCaLP*, *Desat1*, and *ABCC2* genes were grouped with linkage groups 15, 16, and  
 211 22, respectively. These linkage groups corresponded to *B. mori* chromosomes 6, 23, and 15 (Table 4),  
 212 where these candidate genes are known to reside (Gahan *et al.*, 2001; Gahan *et al.*, 2010; Mita *et al.*,  
 213 2004).

214 In total, 99 of the 659 mapped ddRAD-seq loci could be aligned uniquely to a single locus in  
 215 the *B. mori* genome. Twenty-two linkage groups contained ddRAD-seq loci that could be aligned to a  
 216 single *B. mori* chromosome (Table 4), while 8 linkage groups did not contain any that could be aligned.  
 217 Linkage groups 19, 25, and 33 contained ddRAD-seq loci that aligned uniquely to more than one *B.*  
 218 *mori* chromosome. This was unlikely caused by spurious associations between ddRAD-seq loci;  
 219 increasing the LOD score to 8 failed to break up associations for those three linkage groups.

220

## 221 *Identification of genomic regions resistant to fixation*

222 To determine where heterozygosity was being maintained in the genome, we examined  
 223 nucleotide diversity at the 659 mapped ddRAD-seq loci for Bt-selected (YHD2), non-selected (YDK),  
 224 and inbred line. Of these 659 mapped loci, 302 (46%) were previously included in our population-level  
 225 analyses, and 357 were newly discovered. Nucleotide diversity ( $\pi$ ) was only calculated for a  
 226 population if at least 3 individuals were genotyped at a locus. Therefore only 441 loci were examined  
 227 for the inbred line, and 658 loci were examined for both Bt-selected and non-selected populations. In  
 228 total, 60 (13%) of the mapped loci retained polymorphism in the inbred line, whereas 645 (98%) and  
 229 583 (86%) of mapped loci retained polymorphism in the Bt-selected and non-selected (YDK)  
 230 populations, respectively.

231 DdRAD-seq loci that retained polymorphism in the inbred line were spread over 16 linkage  
 232 groups (Figure 4), and often clustered together within a linkage group (Supplementary Figure 3). We  
 233 used Tajima's D, a statistical test which identifies departures from the neutral model of molecular  
 234 evolution, to determine whether any of these polymorphic loci were under balancing selection in the  
 235 inbred line. Of these 60 polymorphic sites, 20 had statistically significant Tajima's D values ( $q > 0.05$ )  
 236 indicative of balancing selection (Table 5). Linkage groups 3, 11, 14, and 15 each contained multiple  
 237 polymorphic sites that appeared to be under balancing selection. Whereas 5 polymorphic loci on  
 238 linkage group 11 were spread across the length of the linkage group, linkage groups 3, 14, and 15  
 239 contained multiple polymorphic loci clustered together within 5cM of one another.

240 We examined which, if any, of these polymorphic loci with strongly positive Tajima's D values  
 241 were shared between the inbred line, the Bt-selected population, and their ancestral laboratory-reared  
 242 *H. virescens* population (YDK). Following a bayesian adjustment for multiple comparisons (Efron  
 243 2001), no loci showed significantly positive Tajima's D values for the Bt-selected population, but 35

loci had positive Tajima's D values in the non-selected YDK population. While only 3 loci under balancing selection were shared between the inbred line and the non-selected (YDK) populations ( $n = 3$ ), many of the same genomic regions were shared between populations. For example, both populations shared signatures of balancing selection on chromosome 15, for locus Hv20150 at 61 cM. A complete list of the shared genomic regions showing signatures of balancing selection can be found in Table 6.

## Discussion

Here, we examined the degree to which colonization, artificial selection, and intense inbreeding influence genome-wide and fine-scale patterns of diversity. In the absence of a publicly available *H. virescens* reference genome, we used ddRAD-seq *de novo* locus construction to identify multiple subsets of polymorphic loci ranging in size from 125 (where at least 75% of individuals per population contained genotypic data), to 1231 (where at least 25% of individuals had genotypes present per population). Genome-wide measures of allelic diversity,  $F_{IT}$  values, and the degree of homozygosity were either unaffected (Supplementary Figure 2), or minimally affected (Table 2) when markers with high levels of missing genotypic data were present. Therefore, any biased genotype calls made by the Stacks SNP calling algorithm due to our moderate depth of sequencing coverage had little impact on our overall genome-wide estimates of diversity. Our results demonstrate that moderate coverage ddRAD-seq data can be used with confidence when conducting population genomic comparisons of genome-wide means.

We observed a precipitous decline in nucleotide and allelic diversity following long-term laboratory colonization, selection, and inbreeding for *H. virescens*. Despite the decline in genomic diversity for non-selected and Bt-selected laboratory-reared populations, fewer than 10% of loci were

fixed. While our Bt-selected population did not retain the level of genetic diversity that their ancestral (YDK) laboratory-reared population did, they consistently had higher measures of genomic diversity than did the non-selected (BENZ) population. Retention of higher levels of polymorphism in our Bt-selected line was likely due to the measures taken during its generation to ensure genomic diversity was maintained in the face of strong selection (Gould, 1995). Alternatively, strong genetic bottlenecks in the non-selected (BENZ) population prior to their use in our study could explain why our Bt-selected line was more genetically diverse than the non-selected line. Overall, differences among Bt-selected and non-selected laboratory-reared populations were modest; when 18 total alleles were sampled, laboratory-reared populations retained *ca.* 3 alleles per 350-bp locus relative to 9 alleles per 350-bp locus present in field-collected *H. virescens*. However, few low frequency alleles remained in the laboratory-reared populations relative to the field-collected populations (Figure 2), which has been observed elsewhere (Munstermann, 1994). For this reason, laboratory-reared populations are generally considered inbred (Roush, 1986). In the case of *H. virescens*, our results clearly show that a great deal of genomic diversity is retained, even following decades in colony. Few genome assembly algorithms accommodate polymorphism well (Kajitani *et al.*, 2014), and it is clear that the reductions in heterozygosity in our inbred line will be useful for production of a high quality *H. virescens* reference genome assembly.

Following 10 generations of inbreeding, > 80% of markers went to fixation in our sib-mated *H. virescens* population. Indeed, our inbreeding coefficient  $F_{IT}$ , as observed from our ddRAD-seq data, met theoretical expectations for all subsets of loci. Our *H. virescens* laboratory population was more amenable to inbreeding than other insect species (Munstermann, 1994; Rumball *et al.*, 1994; Turissini *et al.*, 2014; You *et al.*, 2013), despite their relatively high levels of genomic diversity (Figure 1) and genetic load (Supplementary Figure 4). Higher than expected allelic diversity has been observed in

several other insect species following experimental inbreeding attempts (Munstermann, 1994; Rumball *et al.*, 1994; Turissini *et al.*, 2014; You *et al.*, 2013). As one example, only 57% of the *An. gambiae* genome went to fixation, as observed according to SNP markers, following 10 generations of inbreeding (Turissini *et al.*, 2014). Observed differences between our *H. virescens* population and other insects could be species specific, but is more likely related to the proportion of the genome containing balanced lethal systems (Falconer & Mackay, 1996).

To determine where heterozygosity was being maintained in our inbred line, we developed a high density genetic linkage map for *H. virescens*. Our map contained 659 newly developed 350 bp ddRAD-seq markers that are long enough for future primer design and direct sequencing. This map represents a new tool for an historically important pest species that lacks genomic resources. No ddRAD-seq markers remained unlinked following mapping, which indirectly speaks to the quality of our linkage map. However, the number of groups in our linkage map was 2 more than expected ( $n = 31$ ). This is likely due to the relatively small mapping population size used in this work (Silva *et al.*, 2007). Other mapping studies that analyzed segregating populations of a similar size have also reported genetic maps with excess numbers of linkage groups (Pootakham *et al.*, 2015; Singh *et al.*, 2009). Another possible explanation for the disparity between our observed and expected number of linkage groups is that polymorphic markers may not be evenly distributed over the chromosomes (Paterson, 1996). Perhaps the markers in several of our smaller linkage groups are found on opposite ends of *H. virescens* chromosomes, and thus are unlikely to show strong associations.

When we applied our linkage map to examine fine-scale patterns of genomic change following 10 generations of sib-mating, we found several linkage groups contained clusters of loci that did not go to fixation (Figure 4). Twenty out of the 60 ddRAD-seq loci not fixed for a single allele showed signatures of balancing selection (Table 5). These loci were likely genetically linked to balanced lethal

systems, or perhaps chromosomal inversions. Twelve loci spanning the entire length of linkage group 11 (syntenic to *B. mori* chromosome 9) did not go to fixation in the inbred line, and 5 appeared to be under balancing selection. Furthermore, several loci on this linkage group were under balancing selection in our non-selected (YDK) population, suggesting that a large chromosomal inversion may be present on *H. virescens* linkage group 11.

Several smaller genomic regions with signatures of balancing selection were also shared among our non-selected population (YDK) and inbred line (Table 6). These regions are likely associated with deleterious alleles that were sampled from the original field population in Yadkin County, NC from which our YDK population derived. It is possible that those deleterious alleles were never purged from YDK, but instead increased in frequency creating several balanced lethal systems. YDK is ancestral to the inbred line, so these balanced lethals were likely transmitted the inbred line as it was generated.

## Conclusions

This work serves as one of the most thorough attempts to quantify the effects of genomic responses to selection and inbreeding in a non-model insect species. We demonstrated that laboratory-reared *H. virescens* have reduced allelic and nucleotide diversity relative to field-collected populations, and that inbreeding further diminishes genetic diversity. Although we identified several loci that did not go to fixation in *H. virescens* following 10 generations of inbreeding, our ddRAD-seq marker-based  $F_{IT}$  values met theoretical expectations. The genomic regions that retained polymorphism were likely due to deleterious alleles that were present in the founding individuals, and would unlikely go to fixation. This work demonstrates the difficulty involved in producing fully homozygous insect strains, which are currently critical to producing high-quality, complete reference genomes.

## 336 **Methods**

### 337 *Field-collected H. virescens*

338       Adult male moths were collected from Bossier Parish, Louisiana, and College Station, Texas  
339 using pheromone-baited live traps. Collections took place in LA from May through September, 2012,  
340 and in TX from May through October, 2012. Moths from each collection date were immediately  
341 placed in bottles of 95% ethanol for long-term storage. All bottles were held at -20 °C until DNA  
342 isolations took place.

343

### 344 *H.virescens colonies*

345       *H.virescens* were collected from Yadkin County, NC in 1988 (Gould *et al.*, 1995). This original  
346 population founded two of the colonies used in this study. YHD2 was selected for high levels of Bt  
347 resistance for 4 years on MVP- treated (0.864 mg/mL diet; Mycogen, San Diego, CA) corn-soy diet  
348 (Gould *et al.*, 1995), whereas a non-selected population (YDK) was reared on corn-soy diet alone. A  
349 third population (BENZ) originating from Stoneville, MS, was acquired from Benzon Research  
350 Incorporated (Carlisle, PA). BENZ *H. virescens* were acquired in their pupal stage, and newly eclosed  
351 adults were used for population-level comparisons. To produce an inbred population, single pair  
352 matings (SPMs) were set up between YDK siblings for 10 generations. An initial 37 SPMs were used  
353 to establish 29 lineages in filial generation one (8 single pair matings did not produce progeny). When  
354 SPMs failed to produce offspring, likely due to inbreeding depression, surviving lineages were  
355 expanded (Supplementary Figure 4). This was done to extend inbreeding for as many generations as  
356 possible, thus promoting as complete a reduction in heterozygosity as possible. Adult males from each  
357 laboratory-reared population were killed by freezing (-20 °C), and stored at -80 °C until DNA  
358 isolation.



359

# 360 *Mapping cross*

361 A non-selected female from the BENZ population was crossed to a Bt-selected (YHD2) male in  
362 a single pair mating. One hybrid male offspring was then back-crossed to a Bt-selected (YHD2)  
363 female, and their progeny were reared to adulthood on untreated corn-soy diet according to Joyner and  
364 Gould (1985). Of the 120 progeny, 97 reached adulthood. Parents and their 97 adult progeny were  
365 killed by freezing and stored until DNA isolation as described above.

366

# 367 *Genomic DNA library preparation*

368 All DNA was isolated from the adult thorax using a Qiagen Dneasy Blood and Tissue Kit  
369 (Qiagen, Inc., Valencia, CA, U.S.A.). Genomic DNA samples were prepared for Illumina sequencing  
370 according to the Poland *et al.*, (2012) protocol with minor modifications. Two-hundred ng of DNA per  
371 individual were digested with EcoRI and MspI. For each individual, the overhang sites were ligated to  
372 standard Truseq Universal adapters (Illumina, Inc. San Diego, CA). These adapters, which were  
373 ligated to EcoRI overhang sites, contained one of 48 unique barcodes (Elshire *et al.*, 2011;  
374 Supplementary Table 1). DNA fragments from each individual were assigned a unique barcode, and  
375 individuals were combined into pools of no more than 48 individuals. A Pippin Prep (Sage Science,  
376 Inc., Beverly, MA) was used to select adapter-ligated DNA fragments ranging from 450-650 bp from  
377 each pool. Size-selected DNA fragments were amplified in a Peltier PTC200 thermocycler (here and  
378 throughout) using Illumina primers (Supplementary Table 2) under the following conditions: 72 °C for  
379 5min, 18 cycles of 98 °C for 30 sec, 65 °C for 20 sec, 72 °C for 30 sec, followed by 72 °C for 5 min.  
380 For each pool, 1 of 4 Illumina indices was added via PCR to the MspI adapter. Therefore, sequences  
381 from each individual could be identified by the unique combination of barcode and index. A complete

list of barcodes and indices used in this study can be found in the Supplementary Tables 1 and 2, respectively. Amplified libraries were pooled, cleaned with a Qiaquick PCR Purification Kit (Qiagen, Inc., Valencia, CA, U.S.A.), and diluted to 4nM prior to sequencing. Prepared genomic DNA libraries constructed from 303 *H. virescens* individuals were spread across 9 full and partial Illumina MiSeq runs.

# *De novo marker formation*

Overlapping paired-end reads were merged with FLASH (Magoč & Salzberg, 2011), and Stacks v. 1.09 (Catchen *et al.*, 2011; 2013) was used for demultiplexing and *de novo* formation of loci. Merged paired-end reads were filtered for quality using the process\_radtags script. Further quality filtering entailed removal of reads when: 1) they did not have an intact EcoRI cut site, 2) had a quality score < 30, or 3) were smaller than 350 bp. We did not allow process\_radtags to rescue reads where barcode sequences contained an error. All remaining merged reads were truncated at a length of 350 bp, and fed into the Stacks pipeline.

# *Stacks parameter settings*

Reads from all individuals were run through ustacks with the following parameter settings: -m 3, -M 14 (allowing for 5% nucleotide mismatch rate between alleles per individual), -max\_locus\_stacks 2, --alpha 0.05. A consensus catalog of loci was first formed using the parents of the mapping cross with cstacks, where the -n 14 parameter allowed for a 5% between individual nucleotide mismatch rate. For the mapping family, genotype calls were made using sstacks prior to field- and colony-strain alleles being added to the catalog. Progeny genotypes were automatically corrected using the Stacks genotypes script. Twenty-four individuals of each colony and field-collected strain collected in 2012

were later added to the catalog, and all field-collected and laboratory-reared populations were also genotyped using sstacks.

# *Data analyses*

All population genomic and linkage analysis were conducted in R version 3.1.2 (R core team, 2014).

## *Genomic diversity among H. virescens populations*

In total, we sequenced the 13 surviving males from an inbred line subjected to 10 generations of sib-mating, 42-46 males per colony strain, and 30 males per field-collected population (Table 1). Prior to running sequence data through the Stacks pipeline, we checked individual read counts across populations to ensure uniformity (Supplementary Figure 1). Twelve of the 204 individuals sequenced had too few (< 90,000) or too many reads (> 688,000) and were removed from the dataset prior to analysis, following Bi *et al.* (2013). From our Stacks output, we constructed 4 different sets of consensus loci present across populations. These subsets, containing a core overlapping set of 125 loci, and increasing in size from 125 to 1231, consisted of marker sets with varying percentages of missing genotype calls (range = 11.2-29.5%) (Table 2). We used these 4 different subsets to examine and compare changes in genomic diversity across populations.

We estimated the mean number of unique alleles present per locus, and corresponding 95% non-parametric bootstrapped confidence intervals (N = 5000) across populations using a custom-written R script. Within a population, each locus was randomly sampled without replacement to a depth of 6, 12, 18, and 24 haplotypes, and then unique alleles per locus were counted. Due to their small sample size resulting from intensive inbreeding, we only sampled 6, 12, and 18 haplotypes per locus for the inbred

line. We focused our analysis on the subset of loci containing 378 consensus loci because genotype calls were present for at least 10 individuals per population. Increasing the number of loci analyzed did not significantly change the mean number of unique alleles per population (Supplementary Figure 2). We also calculated two measures of nucleotide diversity per 350 bp locus using the R package, pegas (v. 0.6; Paradis, 2010):  $\pi$  (Nei, 1987) and  $S_K$  corrected for sample size (Charlesworth & Charlesworth, 2010; Watterson, 1975). We then generated population-level genome-wide means and 95% non-parametric bootstrapped ( $N = 5000$ ) confidence intervals for each metric (Table 3).

### *Estimating the inbreeding coefficient*

To estimate our marker-based inbreeding coefficient, we examined multiple sets of loci (Table 2) and found that trends across all datasets were similar (data not shown). However, we reported  $F_{IT}$  values from a set of 378 loci because the dataset contains few missing genotypes per population, while still making inferences from several hundred loci. We calculated  $F_{IT}$  for the inbred line relative to the non-selected (YDK) population after Keller and Waller (2002), where  $(1-F_{IS})(1-F_{ST}) = 1-F_{IT}$ .  $F_{IS}$  was the level of inbreeding within the inbred line, calculated as  $F_{IS} = 1-(H_O/H_E)$ , where  $H_O$  and  $H_E$  were calculated for each locus using the R package adegenet (v. 1.4-2; Jombart, 2008).  $F_{ST}$  was the accumulated effect of inbreeding over time, calculated as  $1-(H_E(\text{inbred line})/H_E(\text{YDK}))$ .

### *Amplification and genotyping of PCR-based markers for the mapping family*

Progeny from the mapping family were genotyped at three additional loci, and these loci were mapped alongside our ddRAD-seq markers to validate our linkage groupings. We targeted the previously described *H. virescens* genes *DesatI*, *ABCC2*, and *HevCaLP* via PCR followed by gel electrophoresis, or direct sequencing. Amplification and genotyping protocols were as follows.

451 A 468 bp fragment from *DesatI* was amplified in a 30  $\mu$ L reaction with forward and reverse  
 452 primers [5'-TGAGGGACCATCGTCTCCAT-3'] and [5'-CACTGCTACATTTTGGGCAG-3'],  
 453 respectively (Ward, 2009). Each reaction contained 6  $\mu$ L of 5 $\times$  GoTaq buffer (ProMega), 29  $\mu$ M per  
 454 dNTP, 92 ng per primer, 0.75 U GoTaq polymerase, and *ca.* 1  $\mu$ g genomic DNA. Sample DNA was  
 455 amplified alongside a negative control (here and throughout), where pcr-grade H<sub>2</sub>O was substituted for  
 456 genomic DNA. Reactions were incubated at 95°C for 1 min followed by 35 cycles of 95°C for 1min,  
 457 52°C for 1min, and 72°C for 2 min. PCR products were purified using a standard ethanol precipitation,  
 458 and directly sequenced on an ABI3730xl (Applied Biosystems, San Francisco, CA). A single  
 459 nucleotide polymorphism (cytosine to tyrosine substitution) at bp 36 was found in the YHD2 parent of  
 460 the mapping cross. Offspring were genotyped at this locus using PolyPhred (Nickerson *et al.*, 1997),  
 461 and genotype calls were visually confirmed using consed (Gordon *et al.*, 1998).

462 An intronic region of the *ABCC2* gene previously described by Gahan *et al.* (2010) was  
 463 amplified using primers Hs-ABC2dU02-F1 [5' – TGGTTACAAGAAATAGAAAATGCAAC-3'] and  
 464 Hs-ABC2eU03-R2 [5' – CTTTCAAACCTGAACCGCATCAC – '3]. Each 30  $\mu$ L reaction volume  
 465 consisted of 6  $\mu$ L of 5 $\times$  GoTaq buffer, 29  $\mu$ M per dNTP, 73 ng per primer, 0.75 U GoTaq polymerase,  
 466 and 1  $\mu$ g genomic DNA. Reactions were held at 95°C for 2 min followed by 30 cycles of 95°C for 30  
 467 sec, 58°C for 30 sec, and 72°C for 40 sec, and the resulting products were cleaned via ethanol  
 468 precipitation. Following sequencing on an ABI3730xl, chromatogram files were visualized using  
 469 FinchTV (version 1.3.1, PerkinElmer, Inc., Seattle, WA). As described by Gahan *et al.* (2010), the  
 470 YHD2 parent was homozygous for a 22 bp deletion, whereas the F<sub>1</sub> parent was heterozygous for this  
 471 deletion. Therefore, we examined the segregation of this deletion in the mapping family offspring,  
 472 which was detectable by the presence of a TAT sequence near amplicon bp 40.

473 Finally, the *HevCaLP* locus described by Gahan *et al.* (2007) was amplified in a multiplexed

474 reaction using three primers: the universal reverse primer [5'-  
475 ATACGAGCTGACGACACGCTGGGAGA-3'], one forward primer that targets a retrotransposon  
476 insertion conferring resistance to *Bacillus thuringiensis* [5' –  
477 CGCAACGCGCGATCTACTCTTGTCACC – 3'], and another forward primer that targets wild-type  
478 sequence [5' – AAGTGTCCCAGTCGATGCTGAA – 3']. An initial 20- $\mu$ l reaction contained 4  $\mu$ l 5 $\times$   
479 GoTaq buffer, 29  $\mu$ M per dNTP, 56 ng per primer, 0.5 U GoTaq polymerase, and 1  $\mu$ g genomic DNA.  
480 Reactions were incubated at 95°C for 2 min, followed by 30 cycles of 95°C for 30 sec, 58°C for 20 sec,  
481 and 72°C for 40 sec. A reconditioning reaction, aimed at reducing heteroduplex formation, was set up  
482 as above, but incubated for 3 rather than 30 cycles. These reactions were capable of producing two  
483 amplicons, which differed in length by 76 bp. The YHD2 parent was homozygous for the long  
484 amplicon (*ca.* 800 bp) containing the insertion that confers resistance to *Bacillus thuringiensis*, whereas  
485 the F<sub>1</sub> parent was heterozygous for a long and short amplicon. PCR products from mapping family  
486 offspring were run on a 2% agarose gel alongside Hyperladder I (Bioline, Taunton, MA) for  
487 visualization and genotype scoring.

488

#### 489 *Linkage mapping*

490 Double-digest RAD-seq markers present in fewer than 75% of the mapping family offspring  
491 were filtered out, and the remainder were checked using a chi-square test for mendelian segregation ( $\alpha$   
492 = 0.01). PCR-based markers, as well as those ddRAD-seq markers that segregated in a mendelian  
493 fashion were assigned to linkage groups (LOD = 5, maximum recombination fraction = 0.3) using the  
494 onemap package (Margarido *et al.*, 2007) in R. We validated groupings by aligning all markers to the  
495 *Bombyx mori* genome using Blastn in Kaikobase version 3.2.2 (<http://sgp.dna.affrc.go.jp/KAIKObase/>).  
496 Furthermore, we confirmed that the locations of the *DesatI*, *ABCC2*, and *HevCaLP* pcr-based markers,

as well as ddRAD-seq markers found in their respective linkage groups aligned to the same *B. mori* chromosomes (Table 4). Markers on each linkage group were ordered using the recombination counting and ordering algorithm (RECORD; Van Os *et al.*, 2005). RECORD was chosen based upon previous studies demonstrating the reliability of its performance (Collard *et al.*, 2009, Mollinari *et al.*, 2009).

502

*Assessment of fine-scale differences in nucleotide diversity across laboratory-reared populations*

Markers that retained polymorphism in the inbred line were examined for signatures of balancing selection in the following populations: non-selected (YDK), Bt-selected (YHD2), and the inbred line. We used a Tajima's D test as calculated by the R package, pegas (v. 0.6; Paradis, 2010). A bayesian false discovery rate methodology (Efron *et al.*, 2001) implemented with the R package fdrtool (v.1.2.15; Strimmer 2008) was applied to Tajima's D p-values to account for multiple hypothesis tests.

509

## 510 **Acknowledgements**

Thanks to Dr. R. Whetten of North Carolina State University, and Dr. J. Schaff of the NCSU Genomic Sciences Lab for their insightful suggestions on ways to improve our methods. Dr. S. Micinski, Dr. J. Lopez, and Dr. J. Westbrook collected the moths used in this project. R. Waples provided one of the custom scripts used in our data pipeline. This project is supported by the Biotechnology Risk Assessment Program competitive grant number 2012-33522-19793 from the USDA - National Institute of Food and Agriculture.

517

518

519

## References

- Baeshen, R., Ekechukwu, N., Toure, M., Paton, D., Coulibaly, M., Traoré, S. and Tripet, F. (2014). Differential effects of inbreeding and selection on male reproductive phenotype associated with the colonization and laboratory maintenance of *Anopheles gambiae*. *Malar J*, 13(1), p.19.
- Baxter, S.W., McMillan, O., Chamberlain, N., French-Constant, R.H., Jiggins, C.D. (2009). Prospects for Locating Adaptive Genes in Lepidopteran Genomes. From Molecular Biology and Genetics of the Lepidoptera. CRC Press, Boca Raton, FL, USA. ed. by Goldsmith MR, Marec F. pp. 105-118.
- Bi, K., Linderoth, T., Vanderpool, D., Good, J., Nielsen, R. and Moritz, C. (2013). Unlocking the vault: next-generation museum population genomics. *Molecular Ecology*, 22(24), pp.6018-6032.
- Blanco, C. (2012). *Heliothis virescens* and Bt cotton in the United States. *GM Crops & Food*, 3(3), pp.201-212.
- Boller, E. (1972). Behavioral aspects of mass-rearing of insects. *Entomophaga*, 17(1), pp.9-25.
- Catchen, J., Amores, A., Hohenlohe, P., Cresko, W., Postlethwait, J. and De Koning, D. (2011). Stacks: Building and Genotyping Loci De Novo From Short-Read Sequences. *G3: Genes Genomes Genetics*, 1(3), pp.171-182.
- Catchen, J., Hohenlohe, P., Bassham, S., Amores, A. and Cresko, W. (2013). Stacks: an analysis tool set for population genomics. *Molecular Ecology*, 22(11), pp.3124-3140.
- Charlesworth, B. and Charlesworth, D. (1999). The genetic basis of inbreeding depression. *Genetical Research*, 74(3), pp.329-340.
- Charlesworth, B., Charlesworth, D. (2010). Elements of Evolutionary Genetics. Roberts and Company Publishers, Greenwood, CO, USA. pp. 29.
- Charlesworth, D., and Willis, J.H. (2009). The genetics of inbreeding depression. *Nature Reviews Genetics*, 10, pp.783-796.
- Collard, B., Mace, E., McPhail, M., Wenzl, P., Cakir, M., Fox, G., Poulsen, D., Jordan, D. (2009). How accurate are the marker orders in crop linkage maps generated from large marker datasets? *Crop and Pasture Science*, 60(4), pp.362-372.
- Collins A.M. Artificial selection of desired characteristics in insects. Advances and Challenges in Insect Rearing, Eds. EG King and NC Leppla. USDA Technical Bulletin. Jan. 1984 pp. 9-19.
- Davey, J.W., Cezard, T., Fuentes-Utrilla, P., Eland, C., Gharbi, K., and Blaxter, M.L. (2012). Special features of RAD sequencing data: implications for genotyping. *Molecular Ecology*, 22, pp.3151-3164.
- Dekker, T., Ibba, I., Siju, K.P., Stensmyr, M.C., Hansson, B.S. (2006). Olfactory shifts parallel superspecialism for toxic fruit in *Drosophila melanogaster* sibling, *D. sechellia*. *Current Biology*, 16(1), pp.101-109.
- de Valdez, M.F.W., Nimmo, D., Betz, J., Gong, H.F., James, A.A., Alphey, L. and Black, W.C. (2011). Genetic elimination of dengue vector mosquitoes. *Proceedings of the National Academy of Sciences, USA*, 108(12), pp.4772-4775.



557 Dobzhansky, T., and Spassky, N. (1954). Environmental modification of heterosis in *Drosophila*  
558 *pseudoobscura*. *Proceedings of the National Academy of Sciences, USA*, 40(6), pp.407-415.

559 Efron, B. (2001). Empirical bayes analysis of a microarray experiment. *Journal of the American*  
560 *Statistical Association*, 102, pp.93-103.

561 Elshire, R.J., Glaubitz, J.C., Sun, Q., Poland, J.A., Kawamoto, K., Buckler, E.S., Mitchell, S.E. (2011).  
562 A robust, simple genotyping-by-sequencing (GBS) approach for high diversity species. *PloS ONE*,  
563 6(5), pp. e19379.

564 Etzel, L.K., and Legner, E.F. (1999). Culture and Colonization, Chapter 7 (pp. 125-176) in Handbook  
565 of Biological Control, Academic Press, San Diego, CA, USA. ed. Bellows TS and Fisher TW.

566 Falconer, D.S., and Mackay TFC (1996) Introduction to Quantitative Genetics. Fourth Edition,  
567 Longman Group Ltd. Essex, England. pp. 89.

568 Fox, C.W., Scheibly, K.L., Smith, B.P., Wallin, W.G. (2007). Inbreeding depression in two seed-feeding  
569 beetles *Callosobruchus maculatus* and *Stator limbatus* (Coleoptera: Chrysomelidae). *Bulletin of*  
570 *Entomological Research*, 97(1), pp.49-54.

571 Gahan, L.J., Gould, F., Heckel, D.G. (2001). Identification of a gene associated with Bt resistance in  
572 *Heliothis virescens*. *Science*, 293, pp.857-860.

573 Gahan, L.J., Pauchet, Y., Vogel, H., Heckel, D.G. (2010). An ABC transporter mutation is correlated  
574 with insect resistance to *Bacillus thuringiensis* Cry1Ac toxin. *PloS Genetics*, 6(12), pp. e1001248.

575 Gerloff, C.U., Ottmer, B.K., Schmid-Hempel, B. (2003). Effects of inbreeding on immune response and  
576 body size in a social insect, *Bombus terrestris*. *Functional Ecology*, 17(5), pp. 582-589.

577 Goldman, I. F., Arnold, J., and Carlton, B. C. (1986). Selection for resistance to *Bacillus thuringiensis*  
578 subspecies israelensis in field and laboratory populations of the mosquito *Aedes aegypti*. *Journal of*  
579 *Invertebrate Pathology*, 47(3), pp. 317-324.

580 Goldsmith, M.F., and Marec, F. (2010). Molecular Biology and Genetics of the Lepidoptera. CRC  
581 Press, Boca Raton, FL. pp.28-29.

582 Gordon, D., Abajian, C., Green, P. (1998). Consed: a graphical tool for sequence finishing. *Genome*  
583 *Research*, 8, pp. 195-202.

584 Gould, F., Anderson, A., Reynolds, A., Bumgarner, L., Moar, W. (1995). Selection and genetic analysis  
585 of a *Heliothis virescens* (Lepidoptera: Noctuidae) strain with high levels of resistance to *Bacillus*  
586 *thuringiensis* toxins. *Journal of Economic Entomology*, 88(6), pp.1545-1559.

587 Groot, A., Gemenio, C., Brownie, C., Gould, F., and Schal, C. (2005). Male and female antennal  
588 responses in *Heliothis virescens* and *H. subflexa* to conspecific and heterospecific sex pheromone  
589 compounds. *Environmental Entomology*, 34(2), pp. 256-263.

590 Hohenlohe, P.A., Bassham, S., Etter, P.D., Stiffler, N., Johnson, E.A., Cresko, W.A. (2010). Population  
591 genomics of parallel adaptation in threespine stickleback using sequenced RAD tags. *PLoS Genetics*,  
592 6(2), pp. e1000862.

593

594 Hoy, M.A. (1990). Genetic improvement of parasites and predators. FFTC-NARC International  
595 Seminar on 'The use of parasitoids and predators to control agricultural pests', Tukuha Science City,  
596 Ibaraki-ken, 305 Japan, October 2-7, 1989. pp.15

597 Huettel, M.D. (1976). Monitoring the quality of laboratory-reared insects: A biological and behavioral  
598 perspective. *Environmental Entomology*, 5(5), pp. 807-814.

599 Jombart, T. (2008). adegenet: a R package for the multivariate analysis of genetic markers.  
600 *Bioinformatics*, 24, pp. 1403-1405.

601 Joyner, K. and Gould, F. (1985). Developmental consequences of cannibalism in *Heliothis zea*  
602 (Lepidoptera: Noctuidae). *Annals of the Entomological Society of America*, 78, pp. 24-28.

603 Kajitani, R., Toshimoto, K., Noguchi, H., Toyoda, A., Ogura, Y., Okuno, M., Yabana, M., Harada, M.,  
604 Nagayasu, E., Maruyama, H., Kohara, Y., Fujiyama, A., Hayashi, T., and Itoh, T. (2014). Efficient de  
605 novo assembly of highly heterozygous genomes from whole-genome shotgun short reads. *Genome*  
606 *Research*, 24, pp. 1384-1395.

607 Keller, L.F., and Waller, D.M., (2002). Inbreeding effects in wild populations. *Trends in Ecology and*  
608 *Evolution*, 17(5), pp. 230-241.

609 Kim, S.H., Cheng, K.M., Ritland, C., Ritland, K., and Silversides, F.G., (2007). Inbreeding in the  
610 Japanese quail estimated by pedigree and microsatellite analyses. *Journal of Heredity*, 98(14), pp. 378-  
611 381.

612 Li, R., Li, Y., Fang, X., Yang, H., Wang, J., Kristiansen, K., and Wang, J. (2009). SNP detection for  
613 massively parallel whole-genome resequencing. *Genome Research*, 19, pp. 1124-1132.

614 Mackay, T.F.C., Richards, S., Stone, E.A., Barbadilla, A., Ayroles, J.F., Zhu, D., *et al.*, (2012) The  
615 *Drosophila melanogaster* genetic reference panel. *Nature*, 482, pp. 173-178.

616 Magoc, T., and Salzberg, S. (2011). FLASH: Fast length adjustment of short reads to improve genome  
617 assemblies. *Bioinformatics*, 27(21), pp. 2957-2963.

618 Margarido, G. R. A., Souza, A. P. and Garcia, A. A. F. (2007). OneMap: software for genetic mapping  
619 in outcrossing species. *Hereditas*, 144, pp. 78-79.

620 Mita, K., Kasahara, M., Sasaki, S., Nagayasu, Y., Yamada, T., Kanamori, H., Namiki, N., Kitagawa, M.,  
621 Yamashita, H., Yasukochi, Y., Kadono-Okuda, K., Yamamoto, K., Ajimura, M., Ravikumar, G.,  
622 Shimomura, M., Nagamura, Y., Shin-i, T., Abe, H., Shimada, T., Morishita, S., and Sasaki, T. (2004)  
623 The Genome Sequence of Silkworm, *Bombyx mori*. *DNA Research*, 11(1), pp. 27-35

624 Mukhopadhyay, J., Rangel, E.F., Ghosh, K., Munstermann, L.E. (1997). Patterns of genetic variability  
625 in colonized strains of *Lutzomyia longipalpis* (Diptera: Psychodidae) and its consequences. *American*  
626 *Journal of Tropical Medicine and Hygiene*, 57(2), pp. 216-221.

627 Munstermann, L.E. (1994). Unexpected genetic consequences of colonization and inbreeding: allozyme  
628 tracking in Culicidae (Diptera). *Annals of the Entomological Society of America*, 87(2), pp. 157-164.

629 Nei M (1987) *Molecular evolutionary genetics*. New York: Columbia University Press.

630

631 Nickerson, D.A., Tobe, V.O., and Taylor, S.L. (1997). PolyPhred: automating the detection and  
632 genotyping of single nucleotide substitutions using fluorescence-based resequencing. *Nucleic Acids*  
633 *Research*, 25(14), pp. 2745-2751.

634 Nielsen, R., Paul, J.S., Albrechtsen, A., Song, Y.S. (2011). Genotype and SNP calling from next-  
635 generation sequencing data. *Nature Reviews Genetics*, 12, pp. 443-451.

636 Norris, D.E., Shurtleff, A.C., Toure, Y.T., Lanzaro, G.C. (2001). Microsatellite DNA polymorphism and  
637 heterozygosity among field and laboratory populations of *Anopheles gambiae* s.s. (Diptera: Culicidae).  
638 *Journal of Medical Entomology*, 38(2), pp. 336-340.

639 Oppenheim, S.J., Gould, F., Hopper, K.R. (2012). The genetic architecture of a complex ecological  
640 trait: host plant use in the specialist moth, *Heliothis subflexa*. *Evolution*, 66(11), pp. 3336-3351.

641 Paradis, E. (2010). pegas: an R package for population genetics with an integrated-modular approach.  
642 *Bioinformatics*, 26, 419-420.

643 Paterson, A.H. (1996). Making genetic maps. A.H. Paterson (Ed.), *Genome Mapping In Plants*, R. G.  
644 Landes Company, San Diego, California, pp. 23–29

645 Poland, J.A., Brown, P.H., Sorrells, M.E., Jannink, J.L. (2012). Development of high-density genetic  
646 maps for barley and wheat using a novel two-enzyme genotyping-by-sequencing approach. *PLoS ONE*,  
647 7(2), pp. e32253.

648 Pootakham, W., Jomchai, N., Ruang-areerate, P., Shearman, J. R., Sonthirod, C., Sangsrakru, D.  
649 Tragoonrun, S., Tangphatsornruang, S., (2015). Genome-wide SNP discovery and identification of QTL  
650 associated with agronomic traits in oil palm using genotyping-by-sequencing (GBS). *Genomics*,  
651 105(5), pp. 288-295.

652 Pradeep, A. R., Chatterjee, S. N., & Nair, C. V. (2005). Genetic differentiation induced by selection in  
653 an inbred population of the silkworm *Bombyx mori*, revealed by RAPD and ISSR marker systems.  
654 *Journal of Applied Genetics*, 46(3), pp. 291.

655 R core team (2014). R: A language and environment for statistical computing. R Foundation for  
656 Statistical Computing, Vienna, Austria. URL <http://www.R-project.org/>.

657 Raulston, J.R. (1975). Tobacco budworm: observations on the laboratory adaptation of a wild strain.  
658 *Annals of the Entomological Society of America*, 68, pp. 139-142.

659 Roush, R.T. (1986). Inbreeding depression and laboratory adaptation in *Heliothis virescens*  
660 (Lepidoptera: Noctuidae). *Annals of the Entomological Society of America*, 79, pp. 583-587.

661 Shaw, K.L. (2000). Interspecific genetics of mate recognition: inheritance of female acoustic preference  
662 in Hawaiian crickets. *Evolution*, 54(4), pp.1303-1312.

663 Sheck, A. L., and Gould, F. (1995). Genetic analysis of differences in oviposition preferences of  
664 *Heliothis virescens* and *H. subflexa* (Lepidoptera: Noctuidae). *Environmental Entomology*, 24(2), pp.  
665 341-347.

666 Sheck, A. L., and Gould, F. (1996). The genetic basis of differences in growth and behavior of  
667 specialist and generalist herbivore species: selection on hybrids of *Heliothis virescens* and *Heliothis*

668 *subflexa* (Lepidoptera). *Evolution*, 50(2), pp. 831-841.

669 Sheck, A. L., Groot, A. T., Ward, C. M., Gemenio, C., Wang, J., Brownie, C., Schal, C., and Gould, F.  
670 (2006). Genetics of sex pheromone blend differences between *Heliothis virescens* and *Heliothis*  
671 *subflexa*: a chromosome mapping approach. *Journal of Evolutionary Biology*, 19(2), pp. 600-617.

672 Singh, R., Tan, S.G., Panandam, J.M., Rahman, R.A., Ooi, L.C.L., Low, E.L., Sharma, M., Jansen, J.,  
673 and Cheah, S. (2009). Mapping quantitative trait loci (QTLs) for fatty acid composition in an  
674 interspecific cross of oil palm. *BMC Plant Biology*, 9, 114.

675 Strimmer, K. (2008). fdrtool: a versatile R package for estimating local and tail area-based false  
676 discovery rates. *Bioinformatics Applications*, 24(12), pp. 1461-1462.

677 Tajima, F. (1989) Statistical method for testing the neutral mutation hypothesis by DNA polymorphism.  
678 *Genetics*, 123, pp. 585-595.

679 Taylor, M.F.J., Heckel, D.G., Brown, T.M., Kreitman, M.E., Black, G. (1993). Linkage of pyrethroid  
680 resistance to a sodium channel locus in the tobacco budworm. *Insect Biochemistry and Molecular*  
681 *Biology*, 23(7), pp. 763-775.

682 Tomaru, M., Doi, M., Higuchi, H., Oguma, Y. (2000). Courtship song recognition in the *Drosophila*  
683 *melanogaster* complex: heterospecific songs make females receptive in *D. melanogaster*, but not in *D.*  
684 *sechellia*. *Evolution*, 54(4), pp. 1286-1294.

685 Turissini, D.A., Gamez, S., White, B.J. (2014). Genome-wide patterns of polymorphism in an inbred  
686 line of the African malaria mosquito, *Anopheles gambiae*. *Genome Biology and Evolution*, 6(11), pp.  
687 3094-3104.

688 Van Os, H., Stam, P., Visser, R.G.F., Van Eck, H.J. (2005). RECORD: a novel method for ordering loci  
689 on a genetic linkage map. *Theoretical and Applied Genetics*, 112, pp. 30-40.

690 Ward, M.D. (2009). Genetics of Sex Pheromones: Mapping Desaturase Genes in *Heliothis* Species  
691 (Unpublished Master's Thesis). North Carolina State University, Raleigh, NC.

692 Watterson, G.A. (1975). On the number of segregating sites in genetical models without recombination.  
693 *Theoretical Population Biology*, 7, pp. 256-276.

694 Xu, P., Xu, S., Wu, X., Tao, Y., Wang, B., Wang, S., Qin, D., Lu, Z., Li, G. (2014). Population genomic  
695 analyses from low-coverage RAD-Seq data: a case study on the non-model cucurbit bottle gourd. *The*  
696 *Plant Journal*, 77, pp. 430-442.

697 Young, J.R., Snow, J.W., Hamm, J.J., Perkins, W.D., Haile, D.G. (1975). Increasing the  
698 competitiveness of laboratory-reared corn earworm by incorporation of indigenous moths from the area  
699 of release. *Annals of the Entomological Society of America*, 68, pp. 40-42.

# Figures

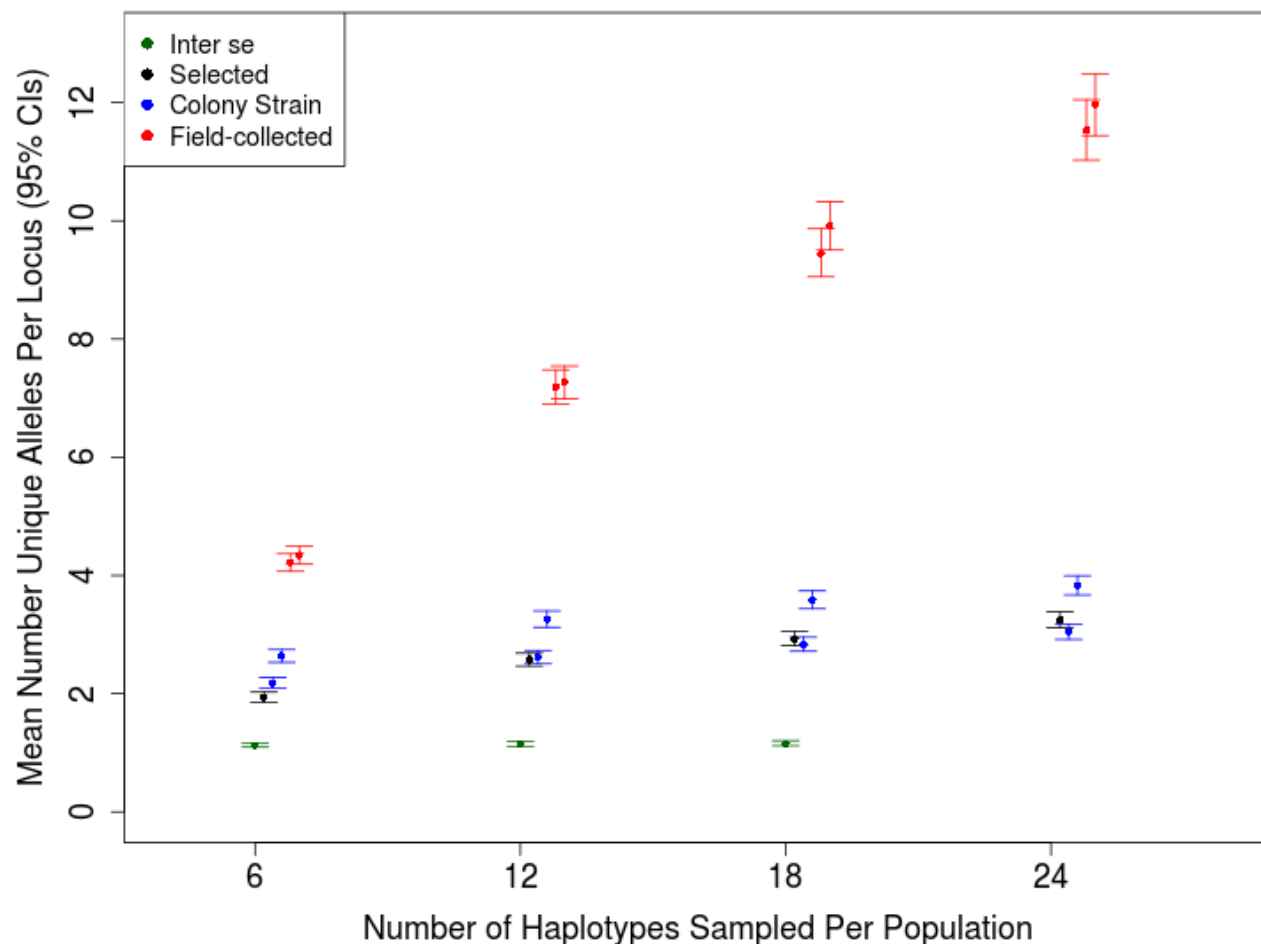

**Figure 1** – Mean numbers of unique alleles detected among 378 loci depend upon the number of haplotypes sampled per population. For all but the inbred line (in green), as sample size increases, so does the number of unique alleles detected per locus. Due to low survivorship in the inbred line, no mean was computed for a haplotype sample size per locus of 24.

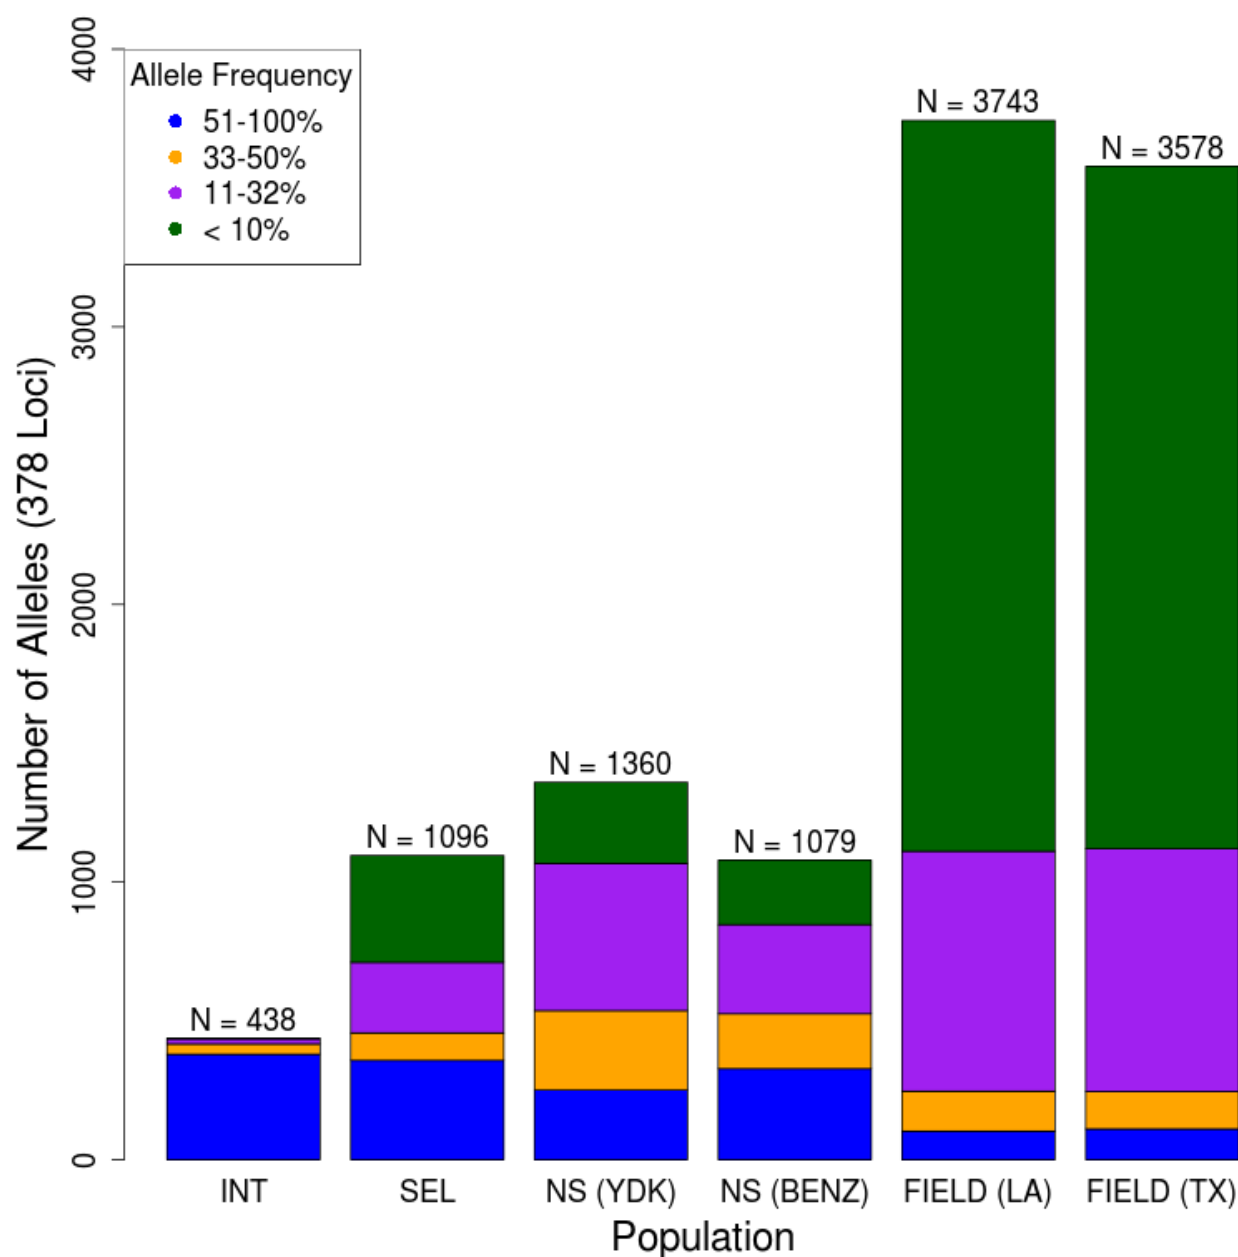

**Figure 2** – Total numbers of unique alleles detected in sib-mated (INT), Bt-selected (SEL), non-selected (NS), and field-collected (FIELD) populations based upon random sampling of 18 haplotypes per population per locus. Alleles were binned and color-coded according to the frequencies at which they were present out of 18 total haplotypes. Numbers above each bar represent the total number of unique alleles found per population out of 378 loci.

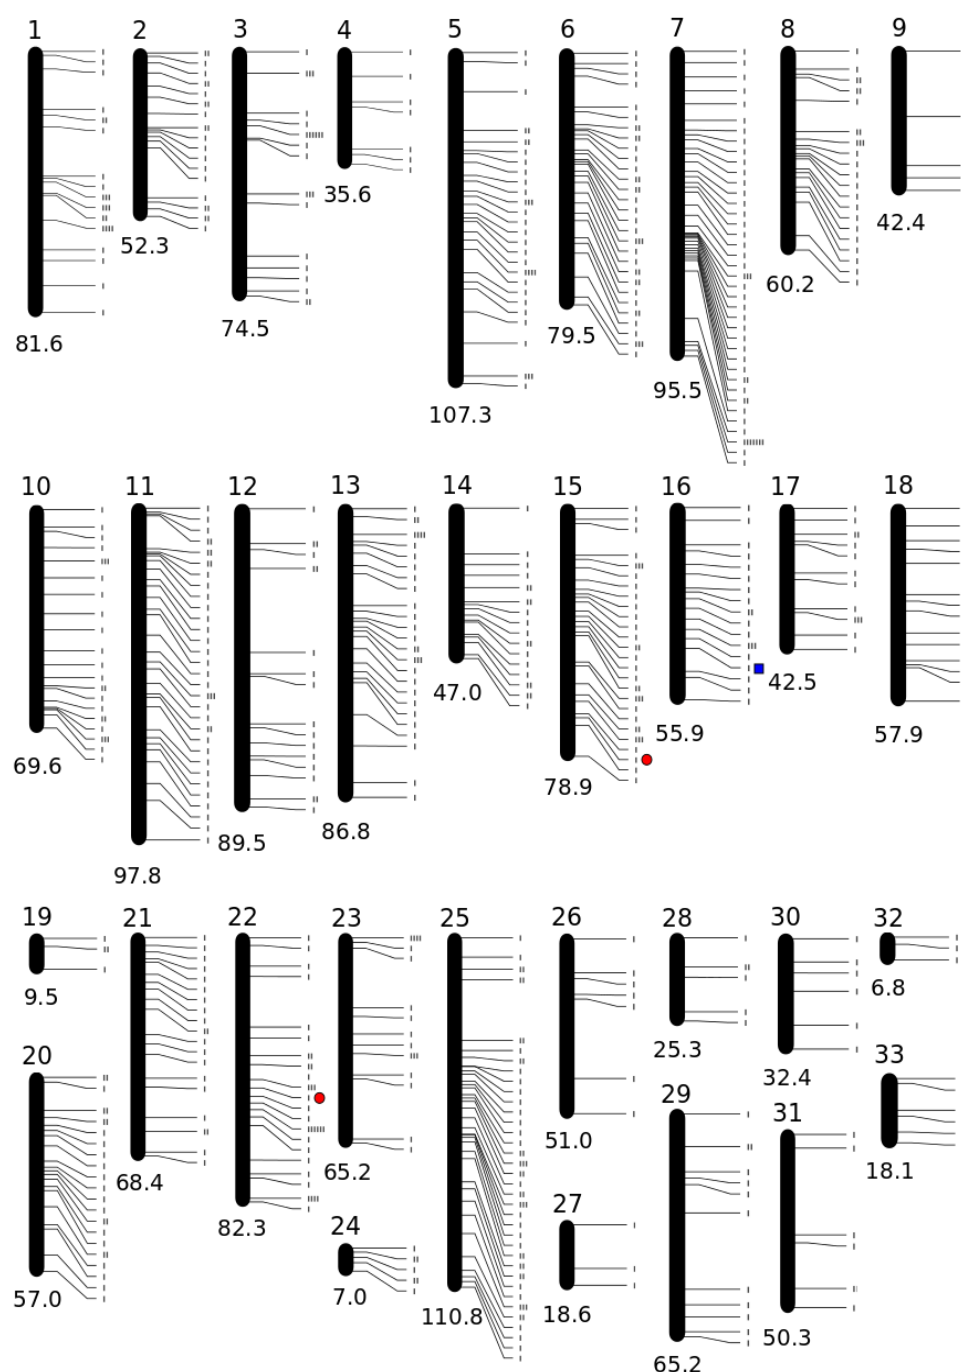

715 **Figure 3** – *Heliothis virescens* linkage map with a total length of 1919.5 cM. Centimorgan lengths are  
716 below each linkage group. Each tick mark represents an individual marker that mapped to a particular  
717 position in the linkage group. Red circles next to linkage groups 15 and 22 represent the positions of  
718 the *HevCaLP*, and the *ABCC2*, respectively. The blue square represents the position of the delta-11-  
719 desaturase on linkage group 16.  
720



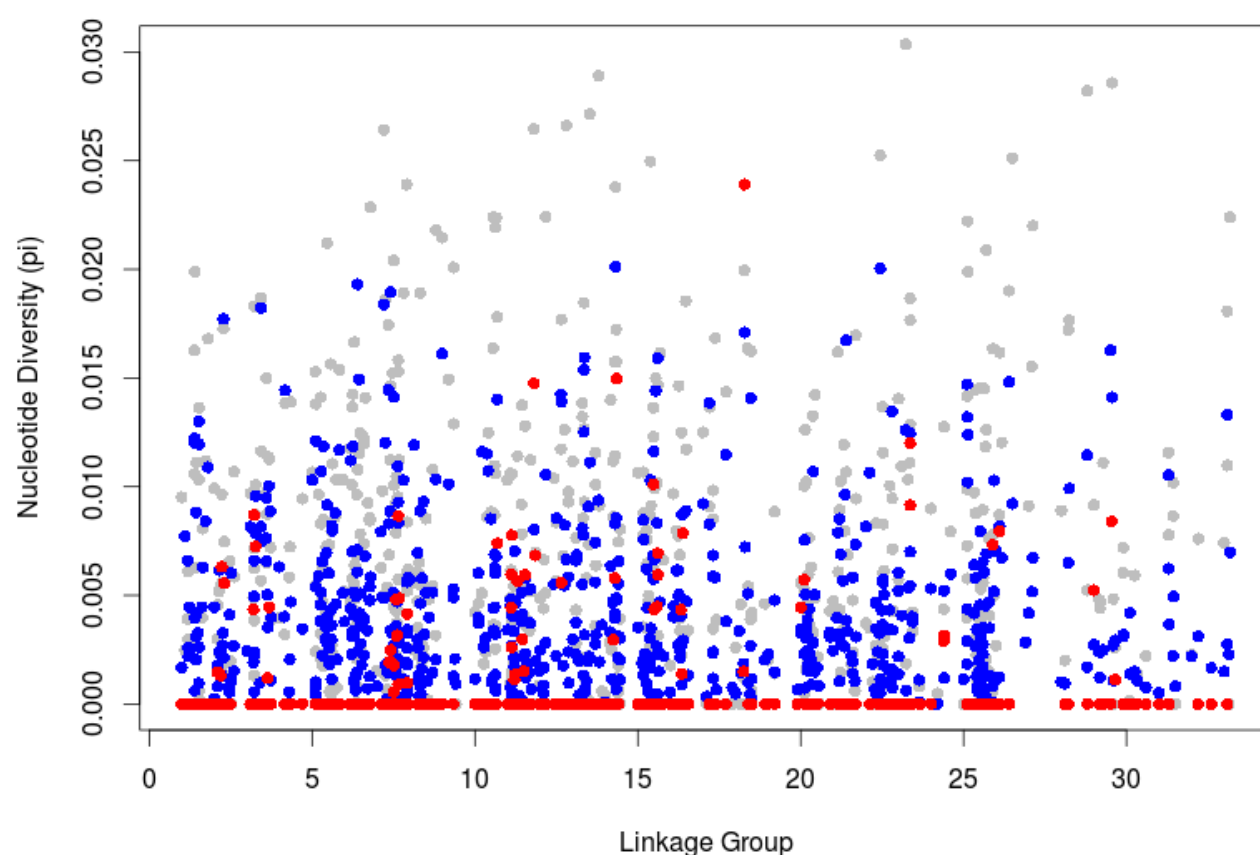

721 **Figure 4** – Nucleotide diversity per mapped marker site. Grey and blue circles represent nucleotide  
722 diversity in non-selected (YDK), and Bt-selected (YHD2) populations, respectively. Red circles  
723 represent nucleotide diversity in the inbred line following 10 generations of sib-mating.



## Tables

**Table 1** - Population history, sample sizes (N) and ddRAD-seq read summary data. Filtered N refers to the population sample size following removal of individuals with low read counts.

| Population  | Population History           | Total N | Filtered N | Mean Number Reads per Individual |
|-------------|------------------------------|---------|------------|----------------------------------|
| Inbred Line | 10 generations of sib-mating | 13      | 13         | 334689                           |
| YHD2        | Bt-selected                  | 43      | 41         | 346264                           |
| BENZ        | Unselected                   | 42      | 40         | 318636                           |
| YDK         | Unselected                   | 46      | 44         | 335728                           |
| LA2012      | Field-collected              | 30      | 27         | 398336                           |
| TX2012      | Field-collected              | 30      | 28         | 306164                           |

746 **Table 2** – Multiple sets of consensus loci used to calculate population genetics parameters. Consensus sets of loci containing 125, 378, and  
747 583 loci are subsets of the largest set containing 1231 loci. The mean and maximum numbers of alleles per marker reported represent  
748 summary statistics for the entire multi-population dataset. The abbreviations Bt-sel and NS stand for Bt-selected and non-selected,  
749 respectively.  
750

| Number<br>of Loci | Missing<br>Genotypes<br>(%) | Mean Number<br>of Alleles per<br>Marker | Max Number<br>of Alleles per<br>Marker | Fixed Loci (% of Total Examined) |                  |             |              |               |               |
|-------------------|-----------------------------|-----------------------------------------|----------------------------------------|----------------------------------|------------------|-------------|--------------|---------------|---------------|
|                   |                             |                                         |                                        | Inbred<br>line                   | Bt-Sel<br>(YHD2) | NS<br>(YDK) | NS<br>(BENZ) | Field<br>(LA) | Field<br>(TX) |
| 125               | 11.2                        | 34                                      | 86                                     | 86.4                             | 7.2              | 5.6         | 8.0          | 2.4           | 0             |
| 378               | 18.6                        | 32                                      | 94                                     | 85.7                             | 5.3              | 5.6         | 7.9          | 1.1           | 0.3           |
| 583               | 19.3                        | 32                                      | 94                                     | 84.2                             | 6.9              | 6.2         | 9.3          | 0.9           | 0.2           |
| 1231              | 29.5                        | 29                                      | 94                                     | 81.3                             | 7.3              | 7.5         | 10.9         | 1.4           | 0.9           |

751  
752  
753  
754  
755  
756

757 **Table 3** – Genome-wide nucleotide diversity values per 350 bp locus across populations. Values were generated by randomly sampling  
758 (without replacement) 18 haplotypes per population, then calculating  $\pi$  and  $S_K$  at each locus. Genome-wide values represent population-level  
759  $\pi$  and  $S_K$  averaged across all loci. The abbreviations Bt-sel and NS stand for Bt-selected and non-selected, respectively.  
760

| Population    | Genome-wide $\pi$ (2.5, 97.5% CIs) | Max $\pi$ | Genome-wide $S_K$ (2.5, 97.5% CIs) | Max $S_K$ |
|---------------|------------------------------------|-----------|------------------------------------|-----------|
| Inbred line   | 0.0006 (0.0004, 0.0008)            | 0.013     | 0.15 (0.10, 0.19)                  | 2.95      |
| Bt-Sel (YHD2) | 0.0040 (0.0035, 0.0043)            | 0.020     | 1.67 (1.54, 1.81)                  | 6.53      |
| NS (YDK)      | 0.0067 (0.0061, 0.0073)            | 0.028     | 1.66 (1.53, 1.80)                  | 6.20      |
| NS (BENZ)     | 0.0051 (0.0046, 0.0056)            | 0.026     | 1.35 (1.24, 1.47)                  | 5.46      |
| Field (LA)    | 0.0093 (0.0086, 0.0100)            | 0.034     | 5.23 (4.92, 5.55)                  | 15.40     |
| Field (TX)    | 0.0092 (0.0085, 0.0099)            | 0.033     | 5.02 (5.15, 5.33)                  | 15.63     |

761

762 **Table 4** – Linkage group (LG) correspondence with *B. mori* chromosome (Chr). Linkage groups with an asterisk contained one or more  
763 markers that aligned uniquely to an unmapped *B. mori* sequence. Where linkage groups contained markers that aligned to more than one *B.*  
764 *mori* chromosome, italicized marker names correspond to the italicized *B. mori* chromosome.

| LG  | <i>B.mori</i> Chr | Number Markers<br>Aligned to <i>B.mori</i><br>Chr | Total<br>markers in<br>LG | LG Length<br>(cM) | Average Marker<br>Spacing (cM) | Names of Markers Aligned to <i>B.mori</i> Chr               |
|-----|-------------------|---------------------------------------------------|---------------------------|-------------------|--------------------------------|-------------------------------------------------------------|
| 1   | 25                | 3                                                 | 25                        | 81.6              | 3.3                            | 19754, 29329, 20282                                         |
| 2   | 8                 | 6                                                 | 23                        | 52.3              | 2.3                            | 22394, 27499, 21475, 17667, 17852, 25500                    |
| 3*  | 17                | 3                                                 | 24                        | 74.5              | 3.1                            | 376, 21931, 25112                                           |
| 4   | -                 |                                                   | 7                         | 35.6              | 5.1                            |                                                             |
| 5*  | 4                 | 5                                                 | 36                        | 107.3             | 3.0                            | 2556, 29595, 22095, 8695, 15160                             |
| 6   | 5                 | 6                                                 | 40                        | 79.5              | 2.0                            | 18575, 4268, 21041, 23679, 66, 5723                         |
| 7   | 22                | 9                                                 | 49                        | 95.5              | 1.9                            | 13710, 2328, 1443, 3654, 13880, 22897, 3123,<br>2430, 19858 |
| 8*  | 11                | 9                                                 | 25                        | 60.2              | 1.7                            | 22584, 939, 3060, 18820, 23156, 17932, 202,<br>22290, 21173 |
| 9   | 23                | 2                                                 | 7                         | 42.4              | 6.1                            | 4275, 1286                                                  |
| 10  | 3                 | 5                                                 | 26                        | 69.6              | 2.7                            | 5015, 5329, 4265, 4545, 23262                               |
| 11  | 9                 | 8                                                 | 37                        | 97.8              | 2.6                            | 19938, 6113, 16969, 19392, 1572, 89,<br>22588, 19343        |
| 12  | -                 |                                                   | 18                        | 89.5              | 5.0                            |                                                             |
| 13  | 13                | 6                                                 | 31                        | 86.8              | 2.8                            | 2074, 15962, 26388, 1193, 16684, 18825                      |
| 14  | 19                | 1                                                 | 21                        | 47.0              | 2.2                            | 14242                                                       |
| 15  | 6                 | 7                                                 | 35                        | 78.9              | 2.3                            | 25943, 4579, 25083, 1752, 3385, 2784, 18178                 |
| 16  | 23                | 4                                                 | 20                        | 55.9              | 2.8                            | 2485, 16350, 806, 20599                                     |
| 17  | 7                 | 2                                                 | 14                        | 42.5              | 3.0                            | 29343, 343                                                  |
| 18  | 26                | 1                                                 | 14                        | 57.9              | 4.1                            | 1113                                                        |
| 19  | 11, 22            | 2                                                 | 4                         | 9.5               | 2.4                            | 3536, <i>16185</i>                                          |
| 20* | 10                | 6                                                 | 25                        | 57.0              | 2.3                            | 17820, 2978, 18970, 12277, 16316, 12984                     |

768 **Table 4 continued.**

769

770

| LG | <i>B.mori</i> Chr | Number Markers<br>Aligned to <i>B.mori</i><br>Chr | Total<br>markers in<br>LG | LG Length<br>(cM) | Average Marker<br>Spacing (cM) | Names of Markers Aligned to <i>B.mori</i> Chr |
|----|-------------------|---------------------------------------------------|---------------------------|-------------------|--------------------------------|-----------------------------------------------|
| 21 | 21                | 3                                                 | 21                        | 68.4              | 3.3                            | 26113, 20542, 7624                            |
| 22 | 15                | 2                                                 | 33                        | 82.3              | 2.5                            | 21411, 5773                                   |
| 23 | 14                | 1                                                 | 17                        | 65.2              | 3.8                            | 4156                                          |
| 24 |                   |                                                   | 7                         | 7.0               | 1.0                            |                                               |
| 25 | 12,1              | 4                                                 | 53                        | 110.8             | 2.0                            | 20280, 9211,12382, 23604                      |
| 26 |                   |                                                   | 7                         | 51.0              | 7.3                            |                                               |
| 27 | 2                 | 1                                                 | 3                         | 18.6              | 6.2                            | 5781                                          |
| 28 |                   |                                                   | 6                         | 25.3              | 4.2                            |                                               |
| 29 | 16                | 1                                                 | 12                        | 65.2              | 5.4                            | 23481                                         |
| 30 |                   |                                                   | 6                         | 32.4              | 5.4                            |                                               |
| 31 |                   |                                                   | 7                         | 50.3              | 7.2                            |                                               |
| 32 |                   |                                                   | 3                         | 6.8               | 2.3                            |                                               |
| 33 | 14, 28            | 2                                                 | 6                         | 18.1              | 3.0                            | 6601, 20184                                   |

772

773

774 **Table 5** – Markers that retained polymorphism following 10 generations of inbreeding, and showed statistically significant ( $\alpha = 0.05$ )  
775 signatures of balancing selection according to Tajima's D. N represents the number of individuals (of 13 total) that were genotyped per  
776 locus. The q-value is derived from a bayesian false discovery rate methodology (Strimmer, 2008) that accounts for multiple comparisons.

| Marker | LG | Position (cM) | N  | $\pi$                | Tajima's D | Unadjusted p-value | q-value |
|--------|----|---------------|----|----------------------|------------|--------------------|---------|
| 856    | 3  | 20            | 11 | $4.3 \times 10^{-3}$ | 2.2        | 0.028              | 0.043   |
| 19130  | 3  | 22            | 13 | $8.7 \times 10^{-3}$ | 2.7        | 0.006              | 0.038   |
| 2599   | 3  | 26            | 11 | $7.2 \times 10^{-3}$ | 2.5        | 0.011              | 0.042   |
| 6113   | 11 | 11            | 9  | $6.0 \times 10^{-3}$ | 2.4        | 0.017              | 0.043   |
| 19392  | 11 | 12            | 12 | $7.8 \times 10^{-3}$ | 2.1        | 0.006              | 0.050   |
| 20645  | 11 | 45            | 12 | $3.0 \times 10^{-3}$ | 2.1        | 0.037              | 0.050   |
| 13922  | 11 | 54            | 10 | $6.0 \times 10^{-3}$ | 2.5        | 0.014              | 0.042   |
| 21320  | 11 | 86            | 10 | $6.8 \times 10^{-3}$ | 2.1        | 0.032              | 0.049   |
| 68     | 14 | 29            | 11 | $5.8 \times 10^{-3}$ | 2.4        | 0.017              | 0.043   |
| 13550  | 14 | 34            | 11 | $1.5 \times 10^{-2}$ | 3.1        | 0.002              | 0.031   |
| 18240  | 15 | 48            | 10 | $1.0 \times 10^{-2}$ | 2.6        | 0.009              | 0.041   |
| 17301  | 15 | 50            | 11 | $4.3 \times 10^{-3}$ | 2.2        | 0.030              | 0.048   |
| 18676  | 15 | 59            | 12 | $4.5 \times 10^{-3}$ | 2.4        | 0.017              | 0.043   |
| 20150  | 15 | 61            | 11 | $6.9 \times 10^{-3}$ | 2.3        | 0.023              | 0.045   |
| 18178  | 15 | 61            | 11 | $5.9 \times 10^{-3}$ | 2.5        | 0.012              | 0.042   |
| 18240  | 16 | 32            | 10 | $4.3 \times 10^{-3}$ | 2.1        | 0.034              | 0.041   |
| 13777  | 18 | 27            | 10 | $2.4 \times 10^{-2}$ | 3.0        | 0.002              | 0.031   |
| 20662  | 20 | 0             | 11 | $4.5 \times 10^{-3}$ | 2.3        | 0.021              | 0.045   |
| 29612  | 23 | 36            | 8  | $1.2 \times 10^{-2}$ | 2.7        | 0.007              | 0.040   |
| 4851   | 26 | 1             | 12 | $8.0 \times 10^{-3}$ | 2.2        | 0.027              | 0.047   |

**Table 6** – Genomic regions that share signatures of balancing selection for the inbred and non-selected (YDK) populations of *H. virescens*. Numbers in parenthesis following cM ranges indicate the numbers of markers with significant Tajima's D values at the corrected significance threshold of  $\alpha = 0.05$  within the cM ranges.

| <b>Linkage Group</b> | <b><u>Range of Positions in cM</u></b> |                     |
|----------------------|----------------------------------------|---------------------|
|                      | <b>Inbred Line</b>                     | <b>Non-selected</b> |
| 3                    | 20-26 (3)                              | 22-26 (2)           |
| 11                   | 11-86 (5)                              | 14-86 (4)           |
| 14                   | 29-34 (2)                              | 30-31 (2)           |
| 15                   | 48-61 (5)                              | 61 (1)              |
| 23                   | 36 (1)                                 | 22 (1)              |
| 26                   | 1 (1)                                  | 1 (1)               |
